# Supplementary material for: Galgravin Isolated from Piper kadsura Ameliorates Lipopolysaccharide (LPS)-Induced Endotoxemia in Mice
Source: MDPI journal article supplement (doi:10.3390/ijms242316572), 2023-11-21
Supplement: s1 [file s1]

**Supplementary Table 1. The primers used in real-time PCR**

| <b>Primer</b> | <b>Sequence</b>         |
|---------------|-------------------------|
| mIL-6-F'      | TAGTCCTTCCTACCCCAATTTCC |
| mIL-6-R'      | TTGGTCCTTAGCCACTCCTTC   |
| mTNF-F'       | CAGGCGGTGCCTATGTCTC     |
| mTNF-R'       | CGATCACCCCGAAGTTCAGTAG  |
| mNOS2-F'      | GTTCTCAGCCCAACAATACAAGA |
| mNOS2-R'      | GTGGACGGGTCGATGTCAC     |
| mCCL4-F'      | TTCTGCTGTTTCTCTTACACCT  |
| mCCL4-R'      | CTGTCTGCCTCTTTTGGTCAG   |
| mCCL5-F'      | GCTGCTTTGCCTACCTCTCC    |
| mCCL5-R'      | TCGAGTGACAAACACGACTGC   |
| mGAPDH-F'     | TGTGATGGGTGTGAACCACGAG  |
| mGAPDH-R'     | TGCTGTTGAAGTCGCAGGAGAC  |
